# Supplementary figures and images for: Rock ‘n’ use of CO2: carbon footprint of carbon capture and utilization by mineralization
Source: Royal Society of Chemistry journal article supplement (doi:10.1039/d0se00190b), 2020-01-01

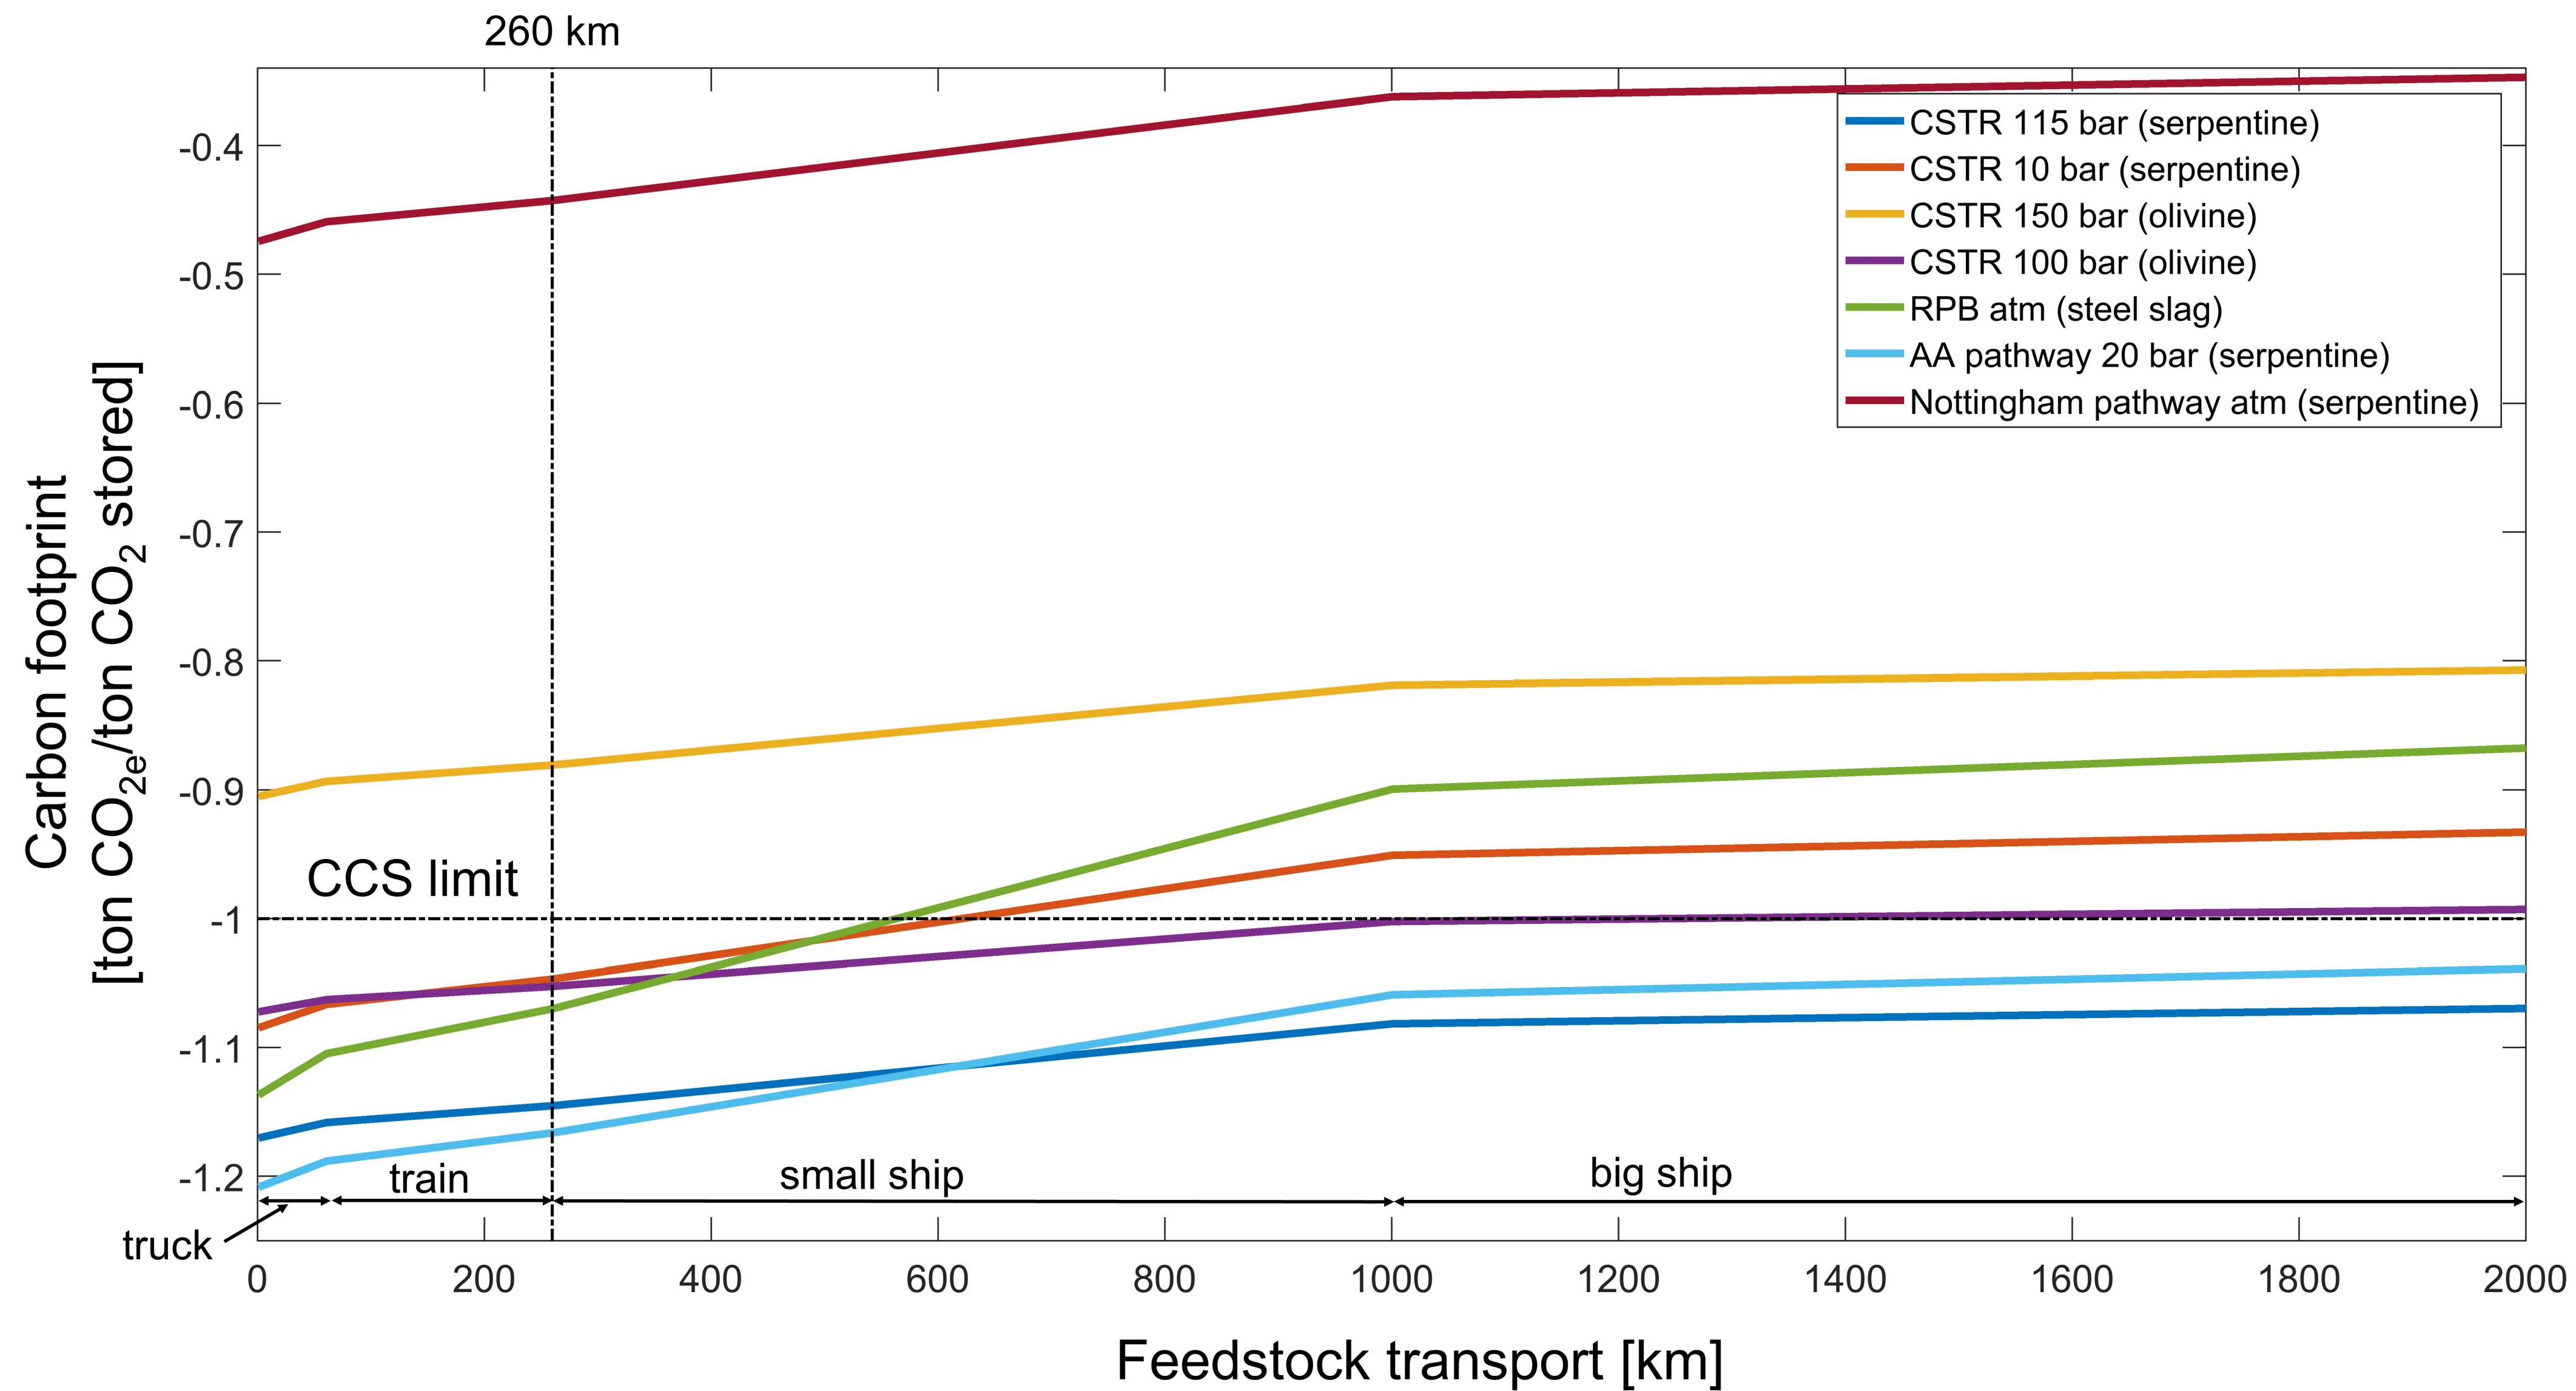

Supplement: d0se00190b3.pdf [file d0se00190b3.pdf]
